# Supplementary material for: Oral inflammation promotes oral squamous cell carcinoma invasion
Source: PubMed Central journal article supplement (PMC6044370; doi:10.18632/oncotarget.25540), 2018-06-26
Supplement: oncotarget-09-29047-s001.pdf [file oncotarget-09-29047-s001.pdf]

# Oral inflammation promotes oral squamous cell carcinoma invasion

## SUPPLEMENTARY MATERIALS

**A FIHC of inflammatory cells - Severe Dysplasia**

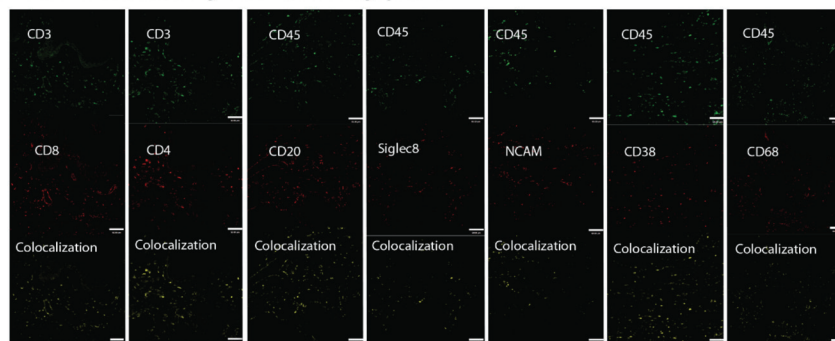

Variation of cytokines in saliva (raw values)

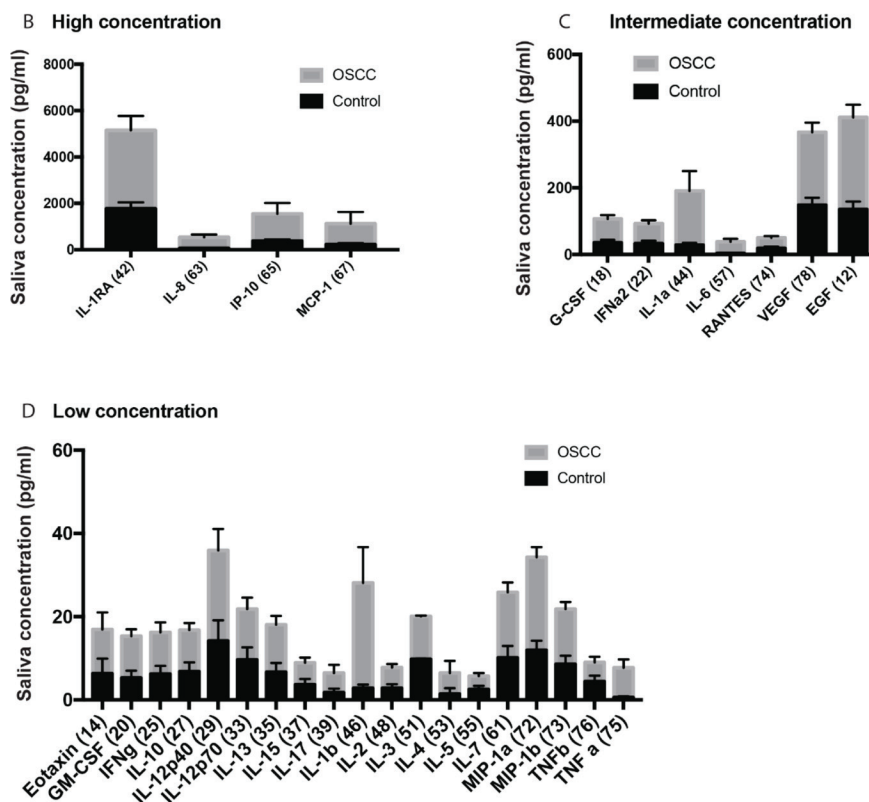

**Supplementary Figure 1:** (A) Representative images of patient samples with severe dysplasia demonstrating co-localization (yellow, overlay) of various antibody markers for inflammatory infiltrate (green and red). Scale bar, 60  $\mu$ m. Concentration of all salivary inflammatory markers tested in control and OSCC patients divided in high concentration (over 500 pg/ml) (B), intermediate concentration (50–500 pg/ml) (C) and low concentration (up to 50 pg/ml) (D).

**A HNSCC overlap**

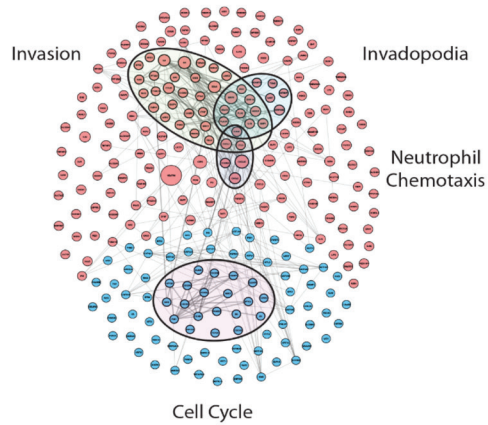

**B Hypergeometric test**

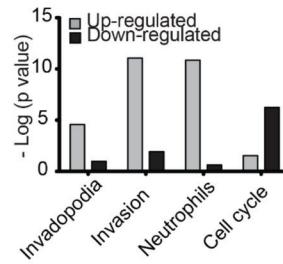

**C Cellular location of up-regulated genes based on IPA, UniProt or GeneCards**

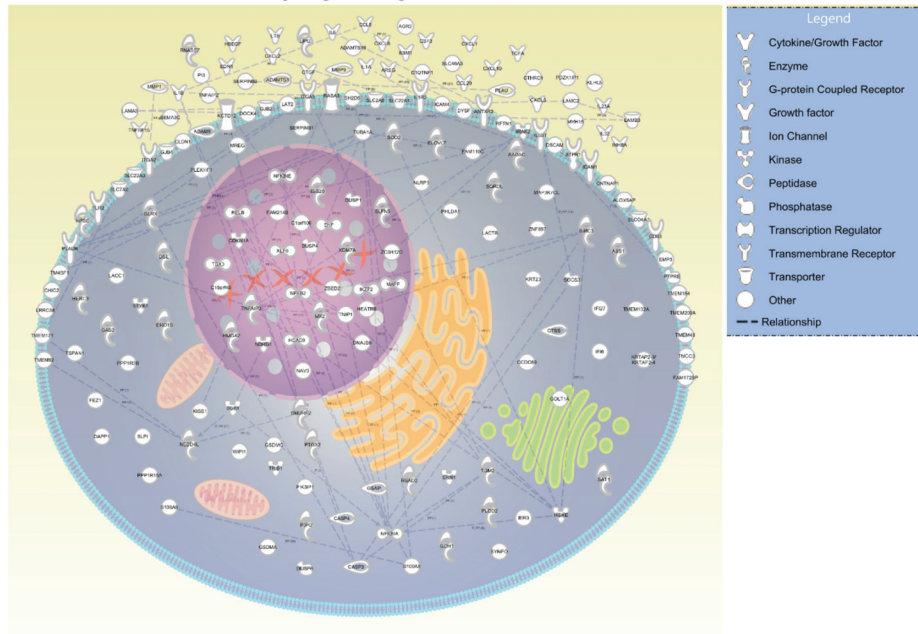

**Supplementary Figure 2:** (A) Overlap of known invasion, invadopodia and neutrophil and cell cycle genes in HNSCC with differential expressed genes identified by mRNA-seq. *p*-values were derived from a hypergeometric test in MATLAB between the number of overlapping nodes for each term within up-regulated or down-regulated genes. (B) Hypergeometric distribution of up-regulated and down-regulated genes from neutrophil, invasion, invadopodia, and cell cycle groups. (C) Graphical illustration of cellular location of up-regulated genes based on IPA, UniProt or GeneCards. Experimentally validated phosphorylation and protein-protein interactions are shown.

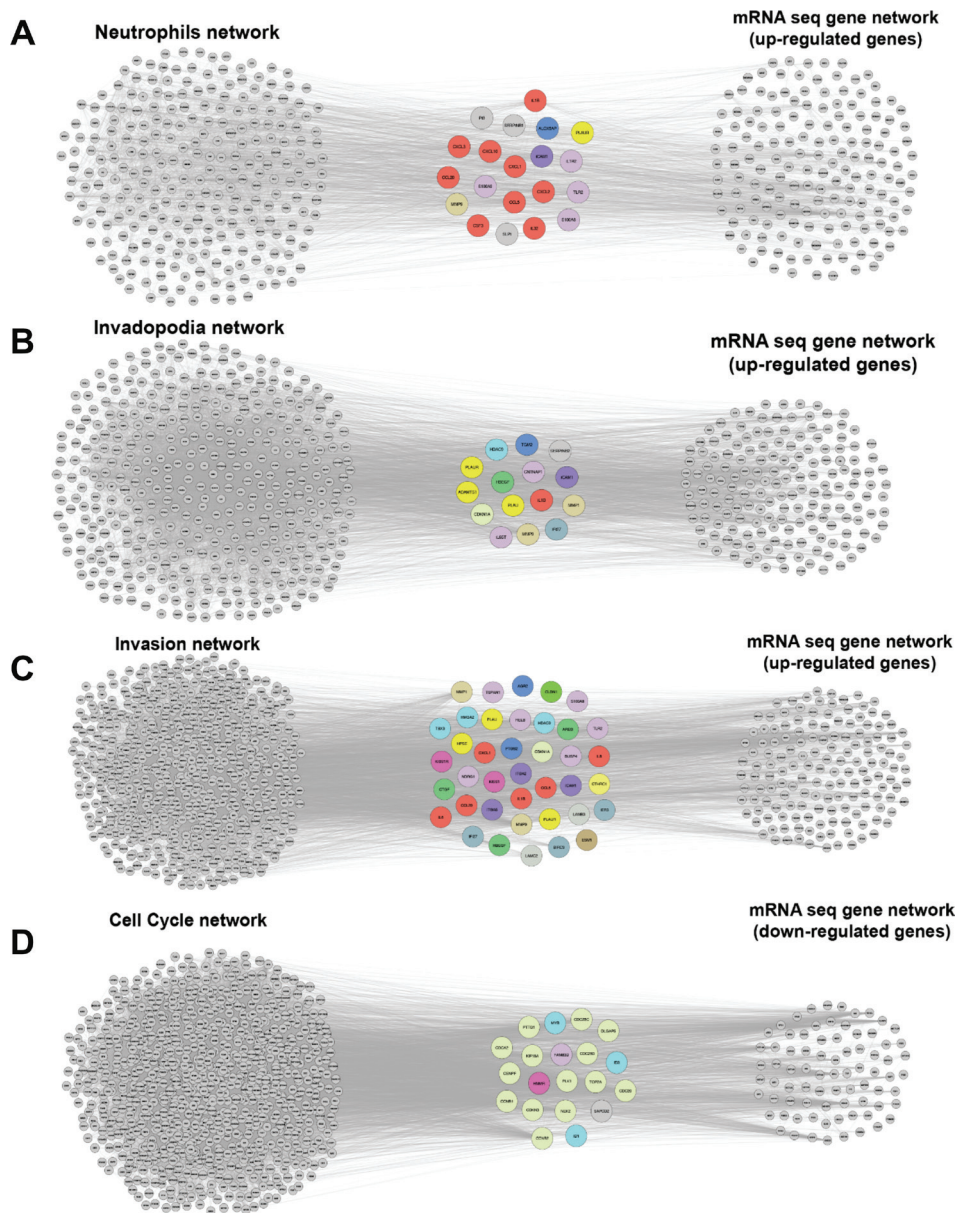

**Supplementary Figure 3: Overlap of known invasion, invadopodia and neutrophil and cell cycle genes with differential expressed genes identified by mRNA-seq.** Neutrophil (A), invadopodia (B), and invasion (C) networks with up-regulated genes and cell cycle (D) network with down-regulated genes were overlapped using Cytoscape. The gene lists were obtained by literature mining using GLAD4U and ALS and were used to build a physical and functional protein-protein association networks in STRING. The combined lists of common nodes were classified based on GeneCards and UniProt identified function.

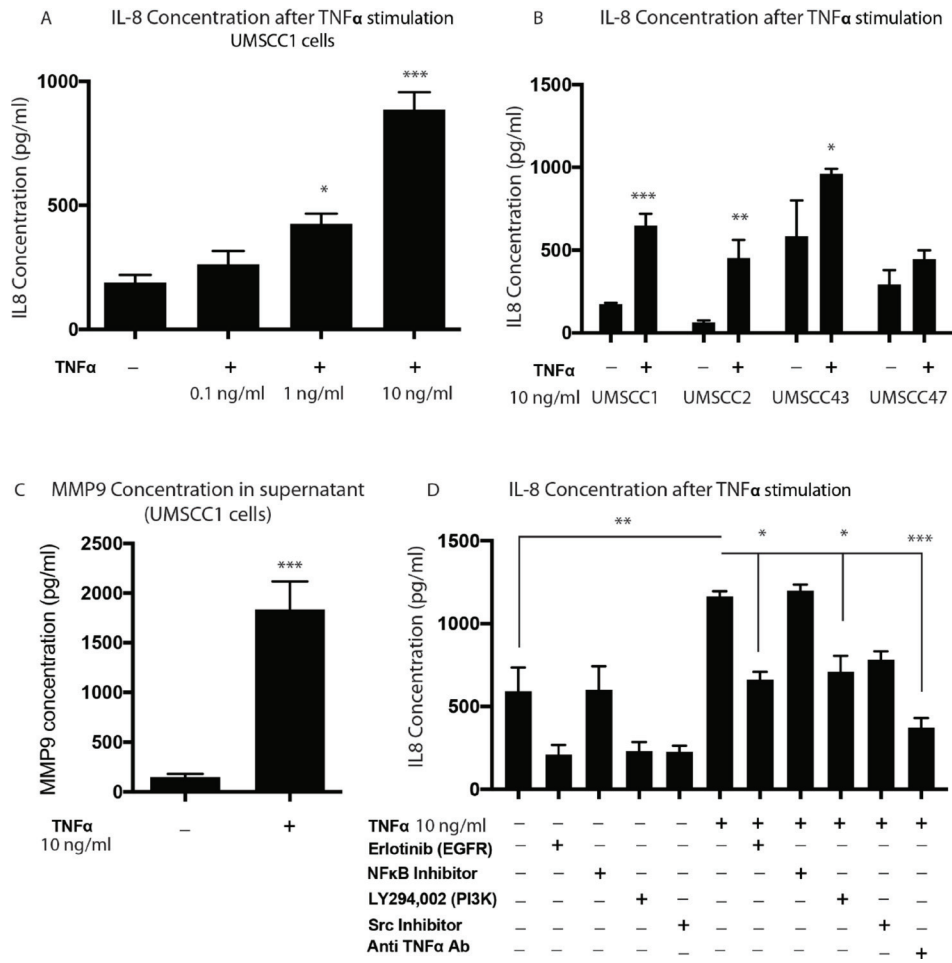

**Supplementary Figure 4:** (A) TNF $\alpha$  10 ng/mL treatment of UMSCC1 leads to maximum IL8 expression. The concentration of IL8 in supernatant was measured by ELISA after stimulation of different concentrations of TNF $\alpha$  for 24 hours and are represented by columns  $\pm$  SEM. (B) UMSCC1, UMSCC2, UMSCC43 and UMSCC47 cells were plated and incubated in the presence of TNF $\alpha$  (10 ng/mL). (C) The concentration of MMP9 in supernatant was measured by ELISA and are represented by columns  $\pm$  SEM. (D) TNF $\alpha$  induced IL8 expression in the presence of cell signaling inhibitors. Results are based on six independent experiments. One-way ANOVA followed by Dunnett's multiple comparison test: \* $P < 0.05$ ; \*\* $P < 0.01$ ; \*\*\* $P < 0.001$ .

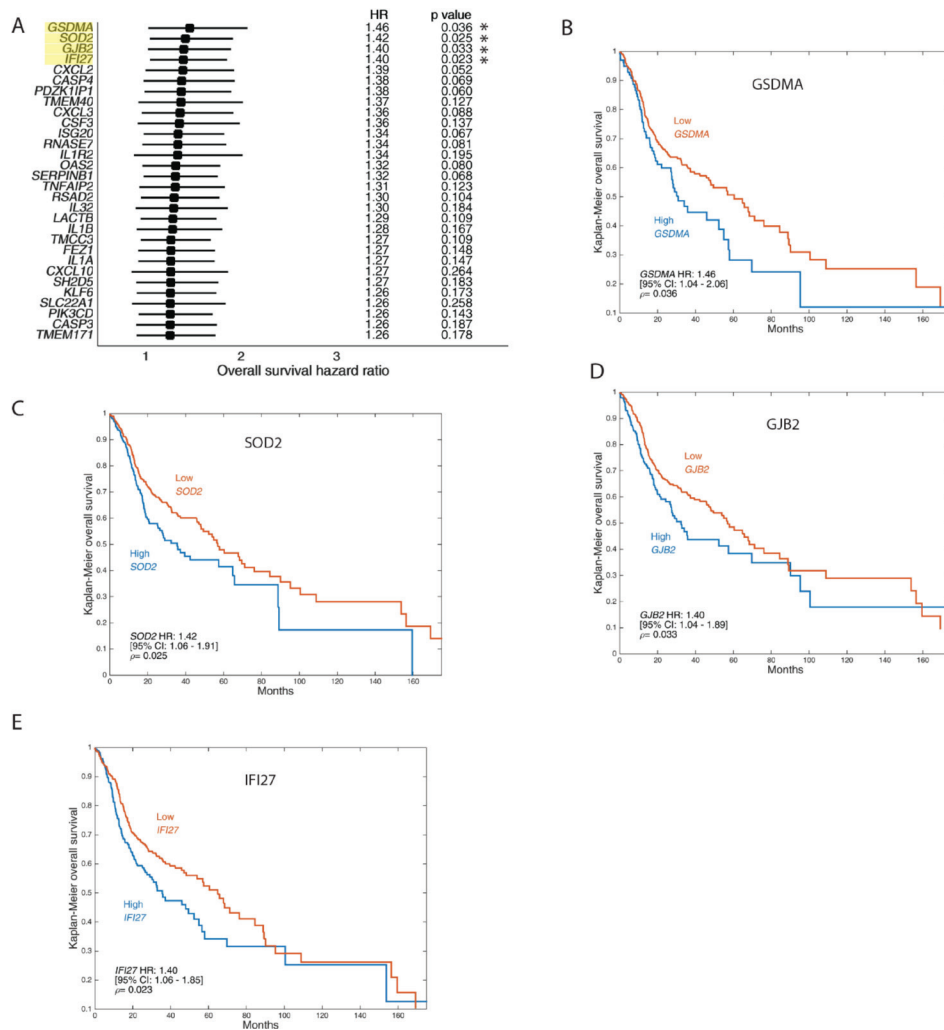

**Supplementary Figure 5: Up-regulation of invasion related genes correlated with poor OSCC patient overall survival.** (A) Forest plots of top 30 overall survival genes obtained by comparing the up-regulated genes that appeared by mRNA sequencing data to TCGA database as above. Kaplan-Meier representation of overall survival in 519 HNSCC samples from TCGA database correlated to expression of genes gasdermin A (B), superoxide dismutase 2 (C), gap junction beta-2 protein (D), and interferon alpha inducible protein 27 (E).

**Supplementary Table 1: Antibodies and inhibitors**

| <b>Antibody</b>                                                   | <b>Species</b>    | <b>Vendor</b>            | <b>Catalog<sup>#</sup></b> |
|-------------------------------------------------------------------|-------------------|--------------------------|----------------------------|
| CD3                                                               | mouse monoclonal  | Abcam                    | Ab699                      |
| CD4                                                               | rabbit monoclonal | Abcam                    | Ab133616                   |
| CD8                                                               | rabbit polyclonal | Abcam                    | Ab4055                     |
| CD45                                                              | mouse monoclonal  | Abcam                    | Ab8216                     |
| CD20                                                              | rabbit monoclonal | Abcam                    | Ab78237                    |
| CD66b                                                             | rabbit monoclonal | Abcam                    | Ab197678                   |
| CD68                                                              | mouse monoclonal  | DAKO                     | M0876                      |
| NCAM                                                              | rabbit monoclonal | Abcam                    | Ab75813                    |
| Siglec-8                                                          | rabbit polyclonal | Abcam                    | Ab38578                    |
| CD38                                                              | rabbit monoclonal | Abcam                    | Ab108403                   |
| Anti-E-Cadherin                                                   | rat monoclonal    | Millipore                | Mabt26                     |
| Cortactin                                                         | rabbit monoclonal | Abcam                    | Ab3333                     |
| Anti-cortactin, phospho-specific (Tyr421)                         | rabbit polyclonal | Millipore                | AB3852                     |
| Tks5                                                              | rabbit polyclonal | Santa Cruz Biotechnology | M-300                      |
| TNFR1                                                             | rabbit Polyclonal | Abcam                    | ab19139                    |
| Donkey Anti-Mouse IgG H&L (Alexa fluoro-555)                      | donkey polyclonal | Abcam                    | ab150110                   |
| Donkey F(ab') <sub>2</sub> Anti-Mouse IgG H&L (Alexa fluoro 647)  | donkey polyclonal | Abcam                    | ab150067                   |
| Donkey F(ab') <sub>2</sub> Anti-Rabbit IgG H&L (Alexa fluoro-568) | donkey polyclonal | Abcam                    | ab175694                   |
| IRDye 680RD anti-Mouse                                            | goat              | LI-COR Biosciences       | 925-68070                  |
| IRDye 800CW anti-Rabbit IgG (925-32211)                           | goat              | LI-COR Biosciences       | 925-32211                  |
| AKT1 (phosphor S473)                                              | rabbit monoclonal | Abcam                    | ab81283                    |
| AKT                                                               | mouse monoclonal  | Abcam                    | ab54752                    |
| Anti-IL8                                                          | mouse Monoclonal  | Abcam                    | ab18672                    |
| Anti-TNF $\alpha$                                                 | mouse Monoclonal  | Abcam                    | ab8348                     |
| <b>Inhibitor</b>                                                  |                   |                          |                            |
| AKT Inhibitor                                                     | -                 | Santa Cruz Biotechnology | sc-394003                  |
| Erlotinib Hydrochloride                                           | -                 | Santa Cruz Biotechnology | sc-202154                  |
| NF $\kappa$ B Inhibitor                                           | -                 | Santa Cruz Biotechnology | sc-3060                    |
| Src Kinase Inhibitor I                                            | -                 | Santa Cruz Biotechnology | sc-204303                  |
| LY-294,002 hydrochloride                                          | -                 | Santa Cruz Biotechnology | sc-215273                  |
| GM6001                                                            | -                 | Sigma                    | M5939                      |
| MMP9 inhibitor I                                                  | -                 | Millipore                | 1177749-58-4               |

List of antibodies and inhibitors utilized in this study.

**Supplementary Table 2: Antibody combinations for inflammatory cell population identification**

|                                         |                               |
|-----------------------------------------|-------------------------------|
| <b>Fluorescent immunohistochemistry</b> | CD3 + CD8 = TCD8 cells;       |
| <b>FIHC</b>                             | CD3 + CD4 = TCD4 cells;       |
|                                         | CD45 + CD20 = B cells;        |
|                                         | CD45 + CD66b = neutrophils;   |
|                                         | CD45 + CD68 = macrophages;    |
|                                         | CD45 + Siglec8 = eosinophils; |
|                                         | CD45 + NCAM = NK cells        |

The combination of markers used to determine the inflammatory cell populations in patient samples utilizing fluorescent immunohistochemistry (FIHC) analysis.

**Supplementary Table 3: Demographic data of patients used for saliva biomarker analysis**

|                | <b>Research ID</b> | <b>Age</b> | <b>Gender</b> |
|----------------|--------------------|------------|---------------|
| <b>OSCC</b>    | 1                  | 90         | M             |
|                | 2                  | 83         | M             |
|                | 3                  | 62         | F             |
|                | 4                  | 74         | F             |
|                | 5                  | 71         | F             |
|                | 6                  | 82         | F             |
|                | 7                  | 43         | F             |
|                | 8                  | 68         | F             |
|                | 9                  | 73         | F             |
|                | 10                 | 60         | M             |
|                | 11                 | 75         | M             |
|                | 12                 | 35         | F             |
|                | 13                 | 82         | F             |
|                | 14                 | 48         | F             |
|                | 15                 | 81         | M             |
|                | 16                 | 53         | M             |
|                | 17                 | 64         | M             |
| <b>Control</b> | 1                  | 28         | M             |
|                | 2                  | 34         | M             |
|                | 3                  | 60         | F             |
|                | 4                  | 63         | F             |
|                | 5                  | 54         | F             |
|                | 6                  | 40         | M             |
|                | 7                  | 57         | F             |
|                | 8                  | 55         | F             |
|                | 9                  | 57         | F             |
|                | 10                 | 61         | F             |
|                | 11                 | 53         | F             |
|                | 12                 | 60         | M             |
|                | 13                 | 34         | F             |

The sex, age, date of saliva sample acquisition of 30 patients (17 cancer patients and 13 control patients without cancer or significant oral diseases) identified by their research ID.

**Supplementary Table 4: Gene classification of up-regulated genes following TNF $\alpha$  stimulation.** TNF $\alpha$  groups was stimulated with TNF $\alpha$  (10 ng/ml) for 24 hours. The data represents 3 independent observations per group with minimum two-fold gene expression change.  $P < 0.05$ . See Supplementary\_Table\_4

**Supplementary Table 5: Gene classification of down-regulated genes following TNF $\alpha$  stimulation.** TNF $\alpha$  groups was stimulated with TNF $\alpha$  (10 ng/ml) for 24 hours. The data represents 3 independent observations per group with significant decreased gene expression change.  $P < 0.05$ . See Supplementary\_Table\_5
