# Supplementary material for: Oral inflammation promotes oral squamous cell carcinoma invasion
Source: PubMed Central journal article supplement (PMC6044370; doi:10.18632/oncotarget.25540), 2018-06-26
Supplement: oncotarget-09-29047-s002.pdf [file oncotarget-09-29047-s002.pdf]

| Gene     | Description                                                     | Classification                     | p_value  | Fold change |
|----------|-----------------------------------------------------------------|------------------------------------|----------|-------------|
| HEATR6   | HEAT Repeat Containing 6 (Amplified in Breast Cancer protein 1) | Unknown                            | 5.00E-05 | 38.27797584 |
| CXCL10   | C-X-C Motif Chemokine Ligand 10                                 | Cytokines and chemokines           | 5.00E-05 | 15.94104036 |
| CSF3     | Colony Stimulating Factor 3                                     | Cytokines and chemokines           | 5.00E-05 | 15.01744345 |
| IL1R2    | Interleukin 1 Receptor Type 2                                   | Signal transduction                | 5.00E-05 | 14.57615539 |
| MMP9     | Matrix Metalloproteinase 9                                      | Matrix metalloproteinase           | 5.00E-05 | 12.57498775 |
| IL8      | C-X-C Motif Chemokine Ligand 8                                  | Cytokines and chemokines           | 5.00E-05 | 12.55720946 |
| ESM1     | Endothelial Cell Specific Molecule 1                            | Angiogenesis                       | 5.00E-05 | 11.79933002 |
| C15orf48 | Chromosome 15 Open Reading Frame 48                             | Unknown                            | 5.00E-05 | 11.06708855 |
| IL6      | Interleukin 6                                                   | Cytokines and chemokines           | 5.00E-05 | 10.42478069 |
| CXCL2    | C-X-C Motif Chemokine Ligand 2                                  | Cytokines and chemokines           | 5.00E-05 | 8.973566295 |
| CCL20    | C-C Motif Chemokine Ligand 20                                   | Cytokines and chemokines           | 5.00E-05 | 8.239765975 |
| IL32     | Interleukin 32                                                  | Cytokines and chemokines           | 5.00E-05 | 7.254775008 |
| SOD2     | Superoxide Dismutase 2, Mitochondrial                           | Metabolism                         | 5.00E-05 | 7.164987224 |
| ICAM4    | Intercellular Adhesion Molecule 4                               | Cell adhesion                      | 5.00E-05 | 7.088417636 |
| CXCL1    | C-X-C Motif Chemokine Ligand 1                                  | Cytokines and chemokines           | 5.00E-05 | 6.620956504 |
| TNFSF15  | Tumor Necrosis Factor Superfamily Member 15                     | Programmed cell death              | 5.00E-05 | 6.501874315 |
| KRTAP2-3 | Keratin Associated Protein 2-3                                  | Cytoskeletal protein               | 5.00E-05 | 6.159735703 |
| TNFAIP3  | TNF Alpha Induced Protein 3                                     | Protein ubiquitination             | 5.00E-05 | 6.123600166 |
| SERPINB2 | Serpin Family B Member 2                                        | Protease inhibitor                 | 5.00E-05 | 6.037214165 |
| HBEGF    | Heparin Binding EGF Like Growth Factor                          | Growth factor                      | 5.00E-05 | 6.032909499 |
| CDKN1A   | Cyclin Dependent Kinase Inhibitor 1A                            | Cell division cycle                | 5.00E-05 | 5.565557824 |
| INHBA    | Inhibin Beta A Subunit                                          | Growth factor                      | 5.00E-05 | 5.453328957 |
| PI3      | Peptidase Inhibitor 3                                           | Protease inhibitor                 | 5.00E-05 | 5.386114914 |
| ALOX5AP  | Arachidonate 5-Lipoxygenase Activating Protein                  | Metabolism                         | 5.00E-05 | 5.37421549  |
| MMP1     | Matrix Metalloproteinase 1                                      | Matrix metalloproteinase           | 5.00E-05 | 5.331592242 |
| IL23A    | Interleukin 23 Subunit Alpha                                    | Cytokines and chemokines           | 5.00E-05 | 5.262495573 |
| BIRC3    | Baculoviral IAP Repeat Containing 3                             | Programmed cell death (inhibition) | 5.00E-05 | 5.017830685 |
| CXCL3    | C-X-C Motif Chemokine Ligand 3                                  | Cytokines and chemokines           | 5.00E-05 | 4.96408716  |
| CLDN1    | Claudin 1                                                       | Cell-cell adhesion                 | 5.00E-05 | 4.699377634 |
| ICAM1    | Intercellular Adhesion Molecule 1                               | Cell adhesion                      | 5.00E-05 | 4.662309967 |
| GSDMA    | Gasdermin A                                                     | Vesicular transport                | 5.00E-05 | 4.603680982 |
| EDN1     | Endothelin 1                                                    | Angiogenesis                       | 5.00E-05 | 4.368072491 |
| S100A9   | S100 Calcium Binding Protein A9                                 | Signal transduction                | 5.00E-05 | 4.334464789 |
| ADAM8    | ADAM Metalloproteinase Domain 8                                 | Matrix metalloproteinase           | 5.00E-05 | 4.261826978 |
| ZBED2    | Zinc Finger BED-Type Containing 2                               | Transcription                      | 5.00E-05 | 4.227316582 |
| DOCK4    | Dedicator Of Cytokinesis 4                                      | Cell-cell adhesion                 | 0.00085  | 4.225082095 |
| AADAC    | Arylacetamide Deacetylase                                       | Metabolism                         | 5.00E-05 | 4.127267896 |
| LTB      | Lymphotoxin Beta                                                | Cytokines and chemokines           | 5.00E-05 | 4.04362989  |
| IL1B     | Interleukin 1 Beta                                              | Cytokines and chemokines           | 5.00E-05 | 3.990107205 |
| C1QTNF1  | C1q And Tumor Necrosis Factor Related Protein 1                 | Unknown                            | 5.00E-05 | 3.803656751 |
| PDZK1IP1 | PDZK1 Interacting Protein 1                                     | Unknown                            | 5.00E-05 | 3.768685998 |
| S100A8   | S100 Calcium Binding Protein A8                                 | Signal transduction                | 5.00E-05 | 3.726087603 |
| PLOD2    | Procollagen-Lysine,2-Oxoglutarate 5-Dioxygenase 2               | ECM formation                      | 5.00E-05 | 3.715939887 |
| DSCAM    | DS Cell Adhesion Molecule                                       | Cell adhesion (neuronal)           | 5.00E-05 | 3.656421366 |
| SLPI     | Secretory Leukocyte Peptidase Inhibitor                         | Protease inhibitor                 | 5.00E-05 | 3.562088803 |
| SLC22A3  | Solute Carrier Family 22 Member 3                               | Ion transporter (neuronal)         | 0.00095  | 3.512341006 |
| LAMA3    | Laminin Subunit Alpha 3                                         | ECM formation                      | 5.00E-05 | 3.411314623 |
| IL1A     | Interleukin 1 Alpha                                             | Cytokines and chemokines           | 5.00E-05 | 3.405882942 |
| LAMB3    | Laminin Subunit Beta 3                                          | ECM formation                      | 5.00E-05 | 3.329645905 |
| KCTD12   | Potassium Channel Tetramerization Domain Containing 12          | Ion transporter (neuronal)         | 5.00E-05 | 3.304352023 |
| PTGS2    | Prostaglandin-Endoperoxide Synthase 2                           | Metabolism                         | 5.00E-05 | 3.292581454 |
| PLAU     | Plasminogen Activator, Urokinase                                | ECM degradation                    | 5.00E-05 | 3.282443151 |
| SLC2A6   | Solute Carrier Family 2 Member 6                                | Glucose transporter                | 5.00E-05 | 3.26822183  |
| DAPP1    | Dual Adaptor Of Phosphotyrosine And 3-Phosphoinositides 1       | Signal transduction                | 5.00E-05 | 3.21387388  |
| NAV3     | Neuron Navigator 3                                              | Signal transduction (neuronal)     | 5.00E-05 | 3.20430376  |

|          |                                                            |                                    |          |             |
|----------|------------------------------------------------------------|------------------------------------|----------|-------------|
| SERPINB1 | Serpin Family B Member 1                                   | Protease inhibitor                 | 5.00E-05 | 3.203094802 |
| IRAK2    | Interleukin 1 Receptor Associated Kinase 2                 | Signal transduction                | 5.00E-05 | 3.198203149 |
| TMEM171  | Transmembrane Protein 171                                  | Unknown                            | 5.00E-05 | 3.169364776 |
| TM4SF1   | Transmembrane 4 L Six Family Member 1                      | Signal transduction                | 5.00E-05 | 3.138539567 |
| GJB2     | Gap Junction Protein Beta 2                                | Cell-cell adhesion                 | 5.00E-05 | 3.134291363 |
| MX2      | MX Dynamin Like GTPase 2                                   | Signal transduction                | 5.00E-05 | 3.133894651 |
| LAMC2    | Laminin Subunit Gamma 2                                    | ECM formation                      | 5.00E-05 | 3.074565633 |
| GSDMC    | Gasdermin C                                                | Programmed cell death              | 5.00E-05 | 3.033137267 |
| PLAUR    | Plasminogen Activator, Urokinase Receptor                  | ECM degradation                    | 5.00E-05 | 3.003023991 |
| TLR2     | Toll Like Receptor 2                                       | Signal transduction                | 5.00E-05 | 2.976070404 |
| DUSP1    | Dual Specificity Phosphatase 1                             | Signal transduction                | 5.00E-05 | 2.920936129 |
| FAM214B  | Family With Sequence Similarity 214 Member B               | Unknown                            | 5.00E-05 | 2.918916912 |
| KRT23    | Keratin 23                                                 | Cytoskeletal protein               | 0.00015  | 2.874876711 |
| SLC22A1  | Solute Carrier Family 22 Member 1                          | Ion transporter                    | 5.00E-05 | 2.846227161 |
| KISS1    | KISS-1 Metastasis-Suppressor                               | Cytoskeletal signaling             | 5.00E-05 | 2.839435436 |
| ADAMTS1  | ADAM Metallopeptidase With Thrombospondin Type 1 Motif 1   | ECM degradation                    | 5.00E-05 | 2.827328912 |
| SOCS3    | Suppressor Of Cytokine Signaling 3                         | Signal transduction                | 5.00E-05 | 2.812031289 |
| TNIP1    | TNFAIP3 Interacting Protein 1                              | Signal transduction                | 5.00E-05 | 2.790494775 |
| ASS1     | Argininosuccinate Synthase 1                               | Metabolism                         | 0.0001   | 2.780131743 |
| GLRX     | Glutaredoxin                                               | Metabolism                         | 5.00E-05 | 2.773407635 |
| TRIB1    | Tribbles Pseudokinase 1                                    | Signal transduction                | 5.00E-05 | 2.766407663 |
| PIK3IP1  | Phosphoinositide-3-Kinase Interacting Protein 1            | Signal transduction                | 5.00E-05 | 2.756010345 |
| ITGA5    | Integrin Subunit Alpha 5                                   | Cell adhesion                      | 5.00E-05 | 2.702731069 |
| TMEM154  | Transmembrane Protein 154                                  | Unknown                            | 5.00E-05 | 2.695093977 |
| TBX3     | T-Box 3                                                    | Transcription                      | 5.00E-05 | 2.674944798 |
| C21orf7  | Chromosome 21 Open Reading Frame 7                         | Unknown                            | 5.00E-05 | 2.669508893 |
| DNAJB9   | DnaJ Heat Shock Protein Family (Hsp40) Member B9           | Programmed cell death (inhibition) | 5.00E-05 | 2.667574959 |
| TMEM200A | Transmembrane Protein 200A                                 | Unknown                            | 5.00E-05 | 2.645095649 |
| CCL5     | C-C Motif Chemokine Ligand 5                               | Cytokines and chemokines           | 5.00E-05 | 2.626961723 |
| FAM172BP | Family With Sequence Similarity 172 Member B, Pseudogene   | Unknown                            | 0.00025  | 2.613718223 |
| AREG     | Amphiregulin                                               | Growth factor                      | 5.00E-05 | 2.608005659 |
| NFKBIE   | NFKB Inhibitor Epsilon                                     | Signal transduction                | 5.00E-05 | 2.600687806 |
| SLFN5    | Schlafen Family Member 5                                   | Signal transduction                | 5.00E-05 | 2.59251939  |
| CD83     | CD83 Molecule                                              | Signal transduction                | 5.00E-05 | 2.587798557 |
| ISG20    | Interferon Stimulated Exonuclease Gene 20                  | Anti viral response                | 0.0007   | 2.580020113 |
| PLEKHF1  | Pleckstrin Homology And FYVE Domain Containing 1           | Programmed cell death              | 0.0009   | 2.578239345 |
| RNASE7   | Ribonuclease A Family Member 7                             | Anti microbial response            | 5.00E-05 | 2.576139485 |
| ERN1     | Endoplasmic Reticulum To Nucleus Signaling 1               | Programmed cell death              | 5.00E-05 | 2.555945856 |
| SLC7A2   | Solute Carrier Family 7 Member 2                           | Ion transporter                    | 5.00E-05 | 2.537625042 |
| RELB     | RELB Proto-Oncogene, NF-KB Subunit                         | Signal transduction                | 5.00E-05 | 2.535570074 |
| HDAC9    | Histone Deacetylase 9                                      | Transcription (epigenetic)         | 5.00E-05 | 2.535425587 |
| WIPI1    | WD Repeat Domain, Phosphoinositide Interacting 1           | Signal transduction                | 5.00E-05 | 2.529514745 |
| SMURF2   | SMAD Specific E3 Ubiquitin Protein Ligase 2                | Protein ubiquitination             | 5.00E-05 | 2.523471988 |
| LACC1    | Laccase Domain Containing 1                                | Unknown                            | 5.00E-05 | 2.519741646 |
| GOLT1A   | Golgi Transport 1A                                         | Vesicular transport                | 5.00E-05 | 2.505115216 |
| SQRDL    | Sulfide Quinone Reductase-Like                             | Metabolism                         | 5.00E-05 | 2.49473762  |
| DUSP4    | Dual Specificity Phosphatase 4                             | Signal transduction                | 5.00E-05 | 2.492702254 |
| TMEM92   | Transmembrane Protein 92                                   | Unknown                            | 5.00E-05 | 2.483101536 |
| CASP3    | Caspase 3                                                  | Programmed cell death              | 5.00E-05 | 2.431630304 |
| SAT1     | Spermidine/Spermine N1-Acetyltransferase 1                 | Metabolism                         | 5.00E-05 | 2.429091068 |
| KLF6     | Kruppel Like Factor 6                                      | Transcription                      | 5.00E-05 | 2.411014244 |
| TMEM132A | Transmembrane Protein 132A                                 | Embryonic development (brain)      | 0.001    | 2.404409955 |
| ITGA2    | Integrin Subunit Alpha 2                                   | Cell adhesion                      | 5.00E-05 | 2.398082434 |
| NDRG1    | N-Myc Downstream Regulated 1                               | Signal transduction                | 5.00E-05 | 2.389064071 |
| PION     | Gamma-Secretase Activating Protein (GSAP)                  | Signal transduction (neuronal)     | 0.00015  | 2.388536013 |
| SLCO4A1  | Solute Carrier Organic Anion Transporter Family Member 4A1 | Ion transporter                    | 0.0002   | 2.356665112 |

|          |                                                                       |                                    |          |             |
|----------|-----------------------------------------------------------------------|------------------------------------|----------|-------------|
| IFI6     | Interferon Alpha Inducible Protein 6                                  | Programmed cell death              | 5.00E-05 | 2.348296907 |
| RSAD2    | Radical S-Adenosyl Methionine Domain Containing 2                     | Anti viral response                | 5.00E-05 | 2.340981837 |
| ADAMTS16 | ADAM Metalloproteinase With Thrombospondin Type 1 Motif 16            | Matrix metalloproteinase           | 0.00035  | 2.340574483 |
| NLRP3    | NLR Family Pyrin Domain Containing 3                                  | Programmed cell death              | 5.00E-05 | 2.340148092 |
| NFKB2    | Nuclear Factor Kappa B Subunit 2                                      | Signal transduction                | 5.00E-05 | 2.332272175 |
| LEPREL1  | Prolyl 3-Hydroxylase 2                                                | ECM formation                      | 5.00E-05 | 2.326985006 |
| NFKBIA   | NFKB Inhibitor Alpha                                                  | Signal transduction                | 5.00E-05 | 2.315126291 |
| ZC3H12C  | Zinc Finger CCCH-Type Containing 12C                                  | Signal transduction                | 5.00E-05 | 2.30293276  |
| MAFF     | MAF BZIP Transcription Factor F                                       | Transcription                      | 5.00E-05 | 2.298249289 |
| CHIC2    | Cysteine Rich Hydrophobic Domain 2                                    | Vesicular transport                | 5.00E-05 | 2.295867144 |
| CASP4    | Caspase 4                                                             | Programmed cell death              | 5.00E-05 | 2.292008778 |
| DUSP6    | Dual Specificity Phosphatase 6                                        | Signal transduction                | 5.00E-05 | 2.285890586 |
| LRRC38   | Leucine Rich Repeat Containing 38                                     | Ion transporter                    | 0.0002   | 2.269682628 |
| SYNPO    | Synaptodin                                                            | Actin binding                      | 0.0002   | 2.266511565 |
| ZNF697   | Zinc Finger Protein 697                                               | Transcription                      | 5.00E-05 | 2.264867154 |
| GJB4     | Gap Junction Protein Beta 4                                           | Cell-cell adhesion                 | 0.00045  | 2.264853762 |
| TGFA     | Transforming Growth Factor Alpha                                      | Growth factor                      | 5.00E-05 | 2.26119935  |
| DSE      | Dermatan Sulfate Epimerase                                            | Metabolism                         | 5.00E-05 | 2.256186172 |
| MYH15    | Myosin Heavy Chain 15                                                 | Cytoskeletal signaling             | 0.0006   | 2.245735442 |
| CCDC69   | Coiled-Coil Domain Containing 69                                      | Signal transduction                | 5.00E-05 | 2.245433201 |
| ANTXR2   | Anthrax Toxin Receptor 2                                              | Cell adhesion                      | 0.00025  | 2.233102104 |
| PHLDA1   | Pleckstrin Homology Like Domain Family A Member 1                     | Programmed cell death              | 5.00E-05 | 2.227716043 |
| GCH1     | GTP Cyclohydrolase 1                                                  | Metabolism                         | 5.00E-05 | 2.227460399 |
| LAT2     | Linker For Activation Of T-Cells Family Member 2                      | Signal transduction                | 0.001    | 2.217578376 |
| EMP3     | Epithelial Membrane Protein 3                                         | Cell-cell adhesion                 | 0.0004   | 2.214503553 |
| JHDM1D   | Lysine Demethylase 7A                                                 | Transcription (epigenetic)(brain)  | 5.00E-05 | 2.212418385 |
| SLC46A3  | Solute Carrier Family 46 Member 3                                     | Ion transporter                    | 0.00045  | 2.212374248 |
| C1orf106 | Chromosome 1 Open Reading Frame 106                                   | Unknown                            | 5.00E-05 | 2.208275493 |
| STYK1    | Serine/Threonine/Tyrosine Kinase 1                                    | Signal transduction                | 0.0001   | 2.191483742 |
| IFI27    | Interferon Alpha Inducible Protein 27                                 | Programmed cell death              | 5.00E-05 | 2.181173826 |
| IKBKE    | Inhibitor Of Kappa Light Polypeptide Gene Enhancer In B-Cells, Kinase | Signal transduction                | 0.00015  | 2.164670884 |
| AGR2     | Anterior Gradient 2, Protein Disulphide Isomerase Family Member       | Metabolism                         | 0.0007   | 2.159479975 |
| SGK1     | Serum/Glucocorticoid Regulated Kinase 1                               | Signal transduction                | 5.00E-05 | 2.146097385 |
| TGM2     | Transglutaminase 2                                                    | Metabolism                         | 5.00E-05 | 2.143600862 |
| OAS2     | 2'-5'-Oligoadenylate Synthetase 2                                     | Anti viral response                | 0.0001   | 2.138390189 |
| PTPRE    | Protein Tyrosine Phosphatase Epsilon, Receptor Type                   | Signal transduction                | 0.0001   | 2.126110012 |
| FEZ1     | Fasciculation And Elongation Protein Zeta 1                           | Cytoskeletal signaling             | 5.00E-05 | 2.123551275 |
| DYSF     | Dysferlin                                                             | Vesicular transport                | 0.00065  | 2.121115487 |
| IER3     | Immediate Early Response 3                                            | Programmed cell death (inhibition) | 5.00E-05 | 2.119541715 |
| LACTB    | Lactamase Beta                                                        | Metabolism                         | 0.00015  | 2.117128153 |
| RASA3    | RAS P21 Protein Activator 3                                           | Signal transduction                | 5.00E-05 | 2.111665258 |
| IL6ST    | Interleukin 6 Signal Transducer                                       | Signal transduction                | 5.00E-05 | 2.106754807 |
| SEMA3C   | Semaphorin 3C                                                         | Development (neuronal)             | 5.00E-05 | 2.098614752 |
| TMEM40   | Transmembrane Protein 40                                              | Unknown                            | 0.0002   | 2.098309774 |
| NEDD4L   | Neural Precursor Cell Expressed, Developmentally Down-Regulated       | Protein ubiquitination             | 5.00E-05 | 2.097236095 |
| TSPAN1   | Tetraspanin 1                                                         | Signal transduction                | 5.00E-05 | 2.0957848   |
| HMGA2    | High Mobility Group AT-Hook 2                                         | Transcription                      | 5.00E-05 | 2.089982322 |
| CTHRC1   | Collagen Triple Helix Repeat Containing 1                             | Vascular remodeling                | 0.0001   | 2.087992358 |
| EHF      | ETS Homologous Factor                                                 | Transcription                      | 5.00E-05 | 2.085464088 |
| IKZF2    | IKAROS Family Zinc Finger 2                                           | Transcription                      | 5.00E-05 | 2.085405442 |
| PPP1R3B  | Protein Phosphatase 1 Regulatory Subunit 3B                           | Metabolism                         | 0.00015  | 2.081258822 |
| PPP1R15A | Protein Phosphatase 1 Regulatory Subunit 15A                          | Programmed cell death              | 5.00E-05 | 2.077019492 |
| CTSS     | Cathepsin S                                                           | Metabolism                         | 0.00015  | 2.076819575 |
| TMCC3    | Transmembrane And Coiled-Coil Domain Family 3                         | Signal transduction (neuronal)     | 5.00E-05 | 2.071038297 |
| LIPG     | Lipase G, Endothelial Type                                            | Metabolism                         | 5.00E-05 | 2.06956324  |
| SH2D5    | SH2 Domain Containing 5                                               | Signal transduction (neuronal)     | 5.00E-05 | 2.066854313 |

|         |                                                              |                          |          |             |
|---------|--------------------------------------------------------------|--------------------------|----------|-------------|
| TNFAIP2 | TNF Alpha Induced Protein 2                                  | Vesicular transport      | 0.00025  | 2.065046979 |
| ERO1LB  | Endoplasmic Reticulum Oxidoreductase 1 Beta                  | Metabolism               | 0.0004   | 2.064824934 |
| MREG    | Melanoregulin                                                | Vesicular transport      | 5.00E-05 | 2.053258852 |
| RFTN1   | Raftlin, Lipid Raft Linker 1                                 | Signal transduction      | 0.0001   | 2.040594802 |
| CTGF    | Connective Tissue Growth Factor                              | Growth factor            | 5.00E-05 | 2.037646933 |
| FAM110C | Family With Sequence Similarity 110 Member C                 | Microtubule organization | 0.0004   | 2.035452133 |
| TUBA1A  | Tubulin Alpha 1a                                             | Cytoskeletal protein     | 0.0006   | 2.025847786 |
| S1PR1   | Sphingosine-1-Phosphate Receptor 1                           | Cytoskeletal signaling   | 0.00025  | 2.020105374 |
| CNTNAP1 | Contactin Associated Protein 1                               | Signal transduction      | 0.0009   | 2.018607598 |
| HERC3   | HECT And RLD Domain Containing E3 Ubiquitin Protein Ligase 3 | Protein ubiquitination   | 0.0003   | 2.013768184 |
| ELOVL7  | ELOVL Fatty Acid Elongase 7                                  | Metabolism               | 5.00E-05 | 2.013392689 |
| KLHL5   | Kelch Like Family Member 5                                   | Actin binding            | 0.00035  | 2.00992777  |
| HPSE    | Heparanase                                                   | ECM degradation          | 0.0003   | 2.00257565  |

**Supplemental Table S4. Gene classification of up-regulated genes following TNF $\alpha$  stimulation.** TNF $\alpha$  groups was stimulated with TNF $\alpha$  (10 ng/ml) for 24 hours. The data represents 3 independent observations per group with minimum two-fold gene expression change. P<0.05.
