# Supplementary material for: Oral inflammation promotes oral squamous cell carcinoma invasion
Source: PubMed Central journal article supplement (PMC6044370; doi:10.18632/oncotarget.25540), 2018-06-26
Supplement: oncotarget-09-29047-s003.pdf [file oncotarget-09-29047-s003.pdf]

| gene                                | Description                                   | Classification                     | p_value  | Fold change |
|-------------------------------------|-----------------------------------------------|------------------------------------|----------|-------------|
| CELSR2                              | Cadherin EGF LAG Seven-Pass G-Type Receptor 2 | Cell-cell adhesion                 | 0.00045  | 0.509752494 |
| CDCA2                               | Cell Division Cycle Associated 2              | Cell division cycle                | 0.00015  | 0.509428656 |
| PTTG1                               | Pituitary Tumor-Transforming 1                | Cell division cycle                | 0.0002   | 0.508455004 |
| TNFAIP8L1                           | TNF Alpha Induced Protein 8 Like 1            | Signal transduction                | 0.00095  | 0.507897068 |
| KIF18A                              | Kinesin Family Member 18A                     | Cell division cycle                | 5.00E-05 | 0.501915464 |
| KITLG                               | KIT Ligand                                    | Growth factor                      | 5.00E-05 | 0.495791365 |
| MYB                                 | MYB Proto-Oncogene, Transcription Factor      | Transcription                      | 0.00085  | 0.49410558  |
| TOP2A                               | Topoisomerase (DNA) II Alpha                  | Cell division cycle                | 5.00E-05 | 0.492909074 |
| CDC25C                              | Cell Division Cycle 25C                       | Cell division cycle                | 0.0002   | 0.491069142 |
| EXPH5                               | Exophilin 5                                   | Vesicular transport                | 0.00015  | 0.490846029 |
| CDC20                               | Cell Division Cycle 20                        | Cell division cycle                | 5.00E-05 | 0.490607109 |
| NEK2                                | NIMA Related Kinase 2                         | Cell division cycle                | 5.00E-05 | 0.489314748 |
| KRT16P2                             | Keratin 16 Pseudogene 2                       | Unknown                            | 0.00035  | 0.484955572 |
| FAM83D                              | Family With Sequence Similarity 83 Member D   | Signal transduction                | 5.00E-05 | 0.481695126 |
| ID3                                 | Inhibitor Of DNA Binding 3, HLH Protein       | Transcription                      | 0.00065  | 0.481389992 |
| IGF2                                | Insulin Like Growth Factor 2                  | Growth factor (glucose metabolism) | 0.00055  | 0.481311601 |
| INS                                 | Insulin                                       | Growth factor (glucose metabolism) | 0.00055  | 0.481311601 |
| PSRC1                               | Proline And Serine Rich Coiled-Coil 1         | Cell division cycle                | 5.00E-05 | 0.480712656 |
| ASPM                                | Abnormal Spindle Microtubule Assembly         | Cell division cycle                | 5.00E-05 | 0.476980285 |
| HMMR                                | Hyaluronan Mediated Motility Receptor         | Cytoskeletal signaling             | 5.00E-05 | 0.475562679 |
| DEPDC1                              | DEP Domain Containing 1                       | Transcription                      | 0.00095  | 0.474484898 |
| MID1                                | Midline 1                                     | Protein ubiquitination             | 5.00E-05 | 0.473761792 |
| NRG1                                | Neuregulin 1                                  | Growth factor                      | 0.0004   | 0.46808087  |
| CCNB2                               | Cyclin B2                                     | Cell division cycle                | 5.00E-05 | 0.46380194  |
| CA9                                 | Carbonic Anhydrase 9                          | Metabolism                         | 0.00065  | 0.463378393 |
| ZNF618                              | Zinc Finger Protein 618                       | Transcription                      | 0.00035  | 0.46149359  |
| SERPINB13                           | Serpin Family B Member 13                     | Protease inhibitor                 | 0.0005   | 0.459936941 |
| CENPF                               | Centromere Protein F                          | Cell division cycle                | 5.00E-05 | 0.45738139  |
| CDC25B                              | Cell Division Cycle 25B                       | Cell division cycle                | 5.00E-05 | 0.455054611 |
| CDKN3                               | Cyclin Dependent Kinase Inhibitor 3           | Cell division cycle                | 5.00E-05 | 0.454144736 |
| FAM64A                              | Family With Sequence Similarity 64 Member A   | Cell division cycle                | 5.00E-05 | 0.449934463 |
| BDKRB2                              | Bradykinin Receptor B2                        | Signal transduction                | 0.0001   | 0.445607312 |
| GAS2L3                              | Growth Arrest Specific 2 Like 3               | Cytoskeletal signaling             | 0.0002   | 0.443492524 |
| KRT80                               | Keratin 80                                    | Cytoskeletal protein               | 0.00025  | 0.442195895 |
| DLGAP5                              | DLG Associated Protein 5                      | Cell division cycle                | 5.00E-05 | 0.441119696 |
| SLC38A4                             | Solute Carrier Family 38 Member 4             | Amino acid transporter             | 0.00035  | 0.440920009 |
| CCNB1                               | Cyclin B1                                     | Cell division cycle                | 5.00E-05 | 0.440273307 |
| PHGDH                               | Phosphoglycerate Dehydrogenase                | Metabolism                         | 5.00E-05 | 0.437943408 |
| OTUD1                               | OTU Deubiquitinase 1                          | Protein ubiquitination             | 5.00E-05 | 0.437121465 |
| KRT5                                | Keratin 5                                     | Cytoskeletal protein               | 5.00E-05 | 0.434040742 |
| SAPCD2                              | Suppressor APC Domain Containing 2            | Unknown                            | 5.00E-05 | 0.429208555 |
| PLK1                                | Polo Like Kinase 1                            | Cell division cycle                | 5.00E-05 | 0.418584906 |
| FGFR2                               | Fibroblast Growth Factor Receptor 2           | Signal transduction                | 5.00E-05 | 0.41668888  |
| RAMP1                               | Receptor Activity Modifying Protein 1         | Signal transduction                | 0.00025  | 0.4115721   |
| WNT10A                              | Wnt Family Member 10A                         | Signal transduction                | 0.0002   | 0.404822531 |
| RDH10                               | Retinol Dehydrogenase 10                      | Metabolism                         | 5.00E-05 | 0.402584005 |
| THBD                                | Thrombomodulin                                | Signal transduction                | 5.00E-05 | 0.399612662 |
| GPC1                                | Glypican 1                                    | Cell adhesion                      | 0.00015  | 0.39940823  |
| EPN3                                | Epsin 3                                       | Vesicular transport                | 0.0002   | 0.398961504 |
| PBX1                                | PBX Homeobox 1                                | Transcription                      | 5.00E-05 | 0.397004616 |
| FAM46B                              | Family With Sequence Similarity 46 Member B   | Unknown                            | 0.00055  | 0.390464341 |
| MEST                                | Mesoderm Specific Transcript                  | Metabolism                         | 5.00E-05 | 0.386986629 |
| C17orf76-AS:LRRC75A Antisense RNA 1 |                                               | Unknown                            | 5.00E-05 | 0.383719101 |
| SNORD49A                            | Small Nucleolar RNA, C/D Box 49A              | Unknown                            | 5.00E-05 | 0.383719101 |
| SNORD49B                            | Small Nucleolar RNA, C/D Box 49B              | Unknown                            | 5.00E-05 | 0.383719101 |

|          |                                                 |                                |          |             |
|----------|-------------------------------------------------|--------------------------------|----------|-------------|
| NAV2     | Neuron Navigator 2                              | Neuronal development           | 5.00E-05 | 0.381662351 |
| MAP2K6   | Mitogen-Activated Protein Kinase Kinase 6       | Signal transduction            | 5.00E-05 | 0.370504292 |
| GRAMD2   | GRAM Domain Containing 2                        | Unknown                        | 5.00E-05 | 0.359064131 |
| DUSP9    | Dual Specificity Phosphatase 9                  | Signal transduction            | 5.00E-05 | 0.359044405 |
| PEG10    | Paternally Expressed 10                         | Programmed cell death          | 5.00E-05 | 0.358095526 |
| NMU      | Neuromedin U                                    | Signal transduction            | 5.00E-05 | 0.357486534 |
| MXRA5    | Matrix Remodeling Associated 5                  | Unknown                        | 5.00E-05 | 0.355789545 |
| KLK5     | Kallikrein Related Peptidase 5                  | ECM formation                  | 5.00E-05 | 0.351732339 |
| TNS4     | Tensin 4                                        | Cytoskeletal signaling         | 0.0003   | 0.350926893 |
| KRT15    | Keratin 15                                      | Cytoskeletal protein           | 5.00E-05 | 0.350289721 |
| OLFML2A  | Olfactomedin Like 2A                            | Cell adhesion                  | 5.00E-05 | 0.349750362 |
| UGT1A1   | UDP Glucuronosyltransferase Family 1 Member A1  | Metabolism                     | 5.00E-05 | 0.33724594  |
| UGT1A10  | UDP Glucuronosyltransferase Family 1 Member A10 | Metabolism                     | 5.00E-05 | 0.33724594  |
| UGT1A3   | UDP Glucuronosyltransferase Family 1 Member A3  | Metabolism                     | 5.00E-05 | 0.33724594  |
| UGT1A4   | UDP Glucuronosyltransferase Family 1 Member A4  | Metabolism                     | 5.00E-05 | 0.33724594  |
| UGT1A5   | UDP Glucuronosyltransferase Family 1 Member A5  | Metabolism                     | 5.00E-05 | 0.33724594  |
| UGT1A6   | UDP Glucuronosyltransferase Family 1 Member A6  | Metabolism                     | 5.00E-05 | 0.33724594  |
| UGT1A7   | UDP Glucuronosyltransferase Family 1 Member A7  | Metabolism                     | 5.00E-05 | 0.33724594  |
| UGT1A8   | UDP Glucuronosyltransferase Family 1 Member A8  | Metabolism                     | 5.00E-05 | 0.33724594  |
| UGT1A9   | UDP Glucuronosyltransferase Family 1 Member A9  | Metabolism                     | 5.00E-05 | 0.33724594  |
| ARSI     | Arylsulfatase Family Member 1                   | Metabolism                     | 5.00E-05 | 0.330188719 |
| CYP1A1   | Cytochrome P450 Family 1 Subfamily A Member 1   | Metabolism                     | 5.00E-05 | 0.320665124 |
| PINLYP   | Phospholipase A2 Inhibitor And LY6/PLAUR Domain | Metabolism                     | 0.0004   | 0.310711142 |
| CRABP2   | Cellular Retinoic Acid Binding Protein 2        | Metabolism                     | 5.00E-05 | 0.30671551  |
| METTL7A  | Methyltransferase Like 7A                       | Metabolism                     | 5.00E-05 | 0.300517864 |
| C10orf67 | Chromosome 10 Open Reading Frame 67             | Unknown                        | 0.0001   | 0.290971275 |
| NGFR     | Nerve Growth Factor Receptor                    | Signal transduction (neuronal) | 5.00E-05 | 0.290557603 |
| HR       | Hair Growth Associated                          | Transcription                  | 5.00E-05 | 0.282378985 |
| ID1      | Inhibitor Of DNA Binding 1, HLH Protein         | Transcription                  | 5.00E-05 | 0.264518578 |
| FAT2     | FAT Atypical Cadherin 2                         | Cell migration                 | 5.00E-05 | 0.258243903 |
| KRT13    | Keratin 13                                      | Cytoskeletal protein           | 5.00E-05 | 0.242824539 |
| KLK6     | Kallikrein Related Peptidase 6                  | ECM degradation                | 5.00E-05 | 0.221782568 |
| SYT12    | Synaptotagmin 12                                | Vesicular transport            | 5.00E-05 | 0.218959673 |
| KRT4     | Keratin 4                                       | Cytoskeletal protein           | 5.00E-05 | 0.156592887 |

**Supplemental Table S5. Gene classification of down-regulated genes following TNF $\alpha$  stimulation.** TNF $\alpha$  groups was stimulated with TNF $\alpha$  (10 ng/ml) for 24 hours. The data represents 3 independent observations per group with significant decreased gene expression change. P<0.05.
